# Supplementary material for: Preoperative Factors for Lymphovascular Invasion in Prostate Cancer: A Systematic Review and Meta-Analysis
Source: MDPI journal article supplement (doi:10.3390/ijms25020856), 2024-01-10
Supplement: s1 [file s1]

**Table S1.** Quality assessment of studies included in the systematic review.

| Study                | Selection                       |                                 |                       |                        | Comparability                                                              |                           | Exposure                                            |                   | Total quality scores |
|----------------------|---------------------------------|---------------------------------|-----------------------|------------------------|----------------------------------------------------------------------------|---------------------------|-----------------------------------------------------|-------------------|----------------------|
|                      | Adequacy of the case definition | Representativeness of the cases | Selection of controls | Definition of controls | Comparability of cases and controls on the basis of the design or analysis | Ascertainment of exposure | Same method of ascertainment for cases and controls | Non-response rate |                      |
| Antunes et al.       | ★                               | ★                               | ★                     | ★                      | ★★                                                                         | ★                         | ★                                                   | -                 | 8                    |
| Brooks et al.        | ★                               | -                               | ★                     | ★                      | ★★                                                                         | ★                         | ★                                                   | -                 | 7                    |
| Cheng et al.         | ★                               | ★                               | ★                     | ★                      | ★★                                                                         | ★                         | ★                                                   | -                 | 8                    |
| D'Andrea et al.      | ★                               | ★                               | ★                     | ★                      | ★                                                                          | ★                         | ★                                                   | -                 | 7                    |
| De La Taille et al.  | ★                               | ★                               | ★                     | ★                      | ★★                                                                         | ★                         | ★                                                   | -                 | 8                    |
| Elharram et al.      | -                               | -                               | ★                     | ★                      | ★                                                                          | ★                         | ★                                                   | -                 | 5                    |
| Fajkovic et al.      | ★                               | ★                               | ★                     | ★                      | ★★                                                                         | ★                         | ★                                                   | -                 | 8                    |
| Fawzy et al.         | -                               | ★                               | ★                     | ★                      | ★                                                                          | ★                         | ★                                                   | -                 | 6                    |
| Ferrari et al.       | ★                               | ★                               | ★                     | ★                      | ★★                                                                         | ★                         | ★                                                   | -                 | 8                    |
| Galiabovitch et al.  | ★                               | ★                               | ★                     | ★                      | ★★                                                                         | ★                         | ★                                                   | -                 | 8                    |
| Gesztes et al.       | ★                               | ★                               | ★                     | ★                      | ★★                                                                         | ★                         | ★                                                   | -                 | 8                    |
| Jamil et al.         | ★                               | ★                               | ★                     | ★                      | ★★                                                                         | ★                         | ★                                                   | -                 | 8                    |
| Jeon et al.          | ★                               | ★                               | ★                     | ★                      | ★★                                                                         | ★                         | ★                                                   | -                 | 8                    |
| Jiménez Vacas et al. | -                               | -                               | -                     | ★                      | ★                                                                          | ★                         | ★                                                   | -                 | 4                    |
| Jung et al.          | ★                               | ★                               | ★                     | ★                      | ★★                                                                         | ★                         | ★                                                   | -                 | 8                    |
| Kang et al.          | ★                               | ★                               | ★                     | ★                      | ★★                                                                         | ★                         | ★                                                   | -                 | 8                    |
| Kim et al.           | -                               | ★                               | ★                     | ★                      | ★                                                                          | ★                         | ★                                                   | -                 | 6                    |
| Kızılay et al.       | -                               | -                               | ★                     | ★                      | ★                                                                          | ★                         | ★                                                   | -                 | 5                    |
| Lin et al.           | -                               | ★                               | ★                     | ★                      | ★★                                                                         | ★                         | ★                                                   | -                 | 7                    |
| Loeb et al.          | ★                               | ★                               | ★                     | ★                      | ★★                                                                         | ★                         | ★                                                   | -                 | 8                    |
| Lotan et al.         | -                               | ★                               | ★                     | ★                      | ★                                                                          | ★                         | ★                                                   | -                 | 6                    |

|                       |   |   |   |   |    |   |   |   |   |
|-----------------------|---|---|---|---|----|---|---|---|---|
| Luo et al.            | - | - | ★ | ★ | ★★ | ★ | ★ | - | 6 |
| Malaeb et al.         | - | ★ | ★ | ★ | ★  | ★ | ★ | - | 6 |
| May et al.            | ★ | ★ | ★ | ★ | ★★ | ★ | ★ | - | 8 |
| Milanese et al.       | - | - | ★ | ★ | ★★ | ★ | ★ | - | 6 |
| Mitsuzuka et al.      | ★ | ★ | ★ | ★ | ★★ | ★ | ★ | - | 8 |
| Ohno et al.           | - | ★ | ★ | ★ | ★  | ★ | ★ | - | 6 |
| Park et al.           | ★ | ★ | ★ | ★ | ★★ | ★ | ★ | - | 8 |
| Rakic et al.          | ★ | ★ | ★ | ★ | ★★ | ★ | ★ | - | 8 |
| Sato et al.           | - | - | ★ | ★ | ★  | ★ | ★ | - | 5 |
| Shariat et al. (2004) | ★ | ★ | ★ | ★ | ★★ | ★ | ★ | - | 8 |
| Shariat et al. (2006) | - | - | ★ | ★ | ★★ | ★ | ★ | - | 6 |
| Shariat et al. (2007) | - | ★ | ★ | ★ | ★★ | ★ | ★ | - | 7 |
| Shin et al.           | - | - | ★ | ★ | ★  | ★ | ★ | - | 5 |
| Van den Ouden et al.  | ★ | ★ | ★ | ★ | ★  | ★ | ★ | - | 7 |
| Wang et al.           | ★ | ★ | ★ | ★ | ★★ | ★ | ★ | - | 8 |
| Wang et al.*          | - | ★ | ★ | ★ | ★  | ★ | ★ | - | 6 |
| Yamamoto et al.       | ★ | ★ | ★ | ★ | ★★ | ★ | ★ | - | 8 |
| Yee et al.            | ★ | ★ | ★ | ★ | ★★ | ★ | ★ | - | 8 |

\* Wang, F.; Liu, F.; Liang, J.; Yang, F.; Xing, N. Preoperative Platelet Count Correlates With Postoperative Perineural Invasion on Specimen in Patients Treated With Radical Prostatectomy. *Front. Oncol.* 2022, 12, 1–10, doi:10.3389/fonc.2022.906936.
